# Supplementary material
Source: PubMed Central journal article supplement (PMC3972059)
Supplement: NIHMS542063-supplement-01.pdf [file NIHMS542063-supplement-01.pdf]

## Supplemental tables and figure

## Table of Contents

|                                                                                                                               | Page  |
|-------------------------------------------------------------------------------------------------------------------------------|-------|
| Table S1. Incidence of acute GVHD, leukemia relapse and survival by ethnicity.                                                | 28    |
| Table S2. Leukemia relapse rate by the severity of acute GVHD.                                                                | 29    |
| Table S3. Other risk factors for acute GVHD, relapse and survival.                                                            | 30    |
| Table S4. Hazard risk (HR) of acute GVHD, leukemia relapse and mortality<br>by ethnicity in bone marrow transplantation cases | 32    |
| Table S5. Leukemia relapse rate by ethnicity and the status at<br>transplantation in bone marrow transplantation cases        | 33    |
| Table S6. Data contributors from International Histocompatibility Working<br>Group in Hematopoietic Cell Transplantation.     | 34-35 |

**Table S1. Incidence of acute GVHD, leukemia relapse and survival by ethnicity**

| <b>Ethnicity of the Pair</b> | <b>N</b> | <b>Grades II-IV Acute<br/>GVHD (%)</b> | <b>Grades III-IV Acute<br/>GVHD (%)</b> | <b>Relapse (%)</b> | <b>5-year Survival<br/>(%)</b> |
|------------------------------|----------|----------------------------------------|-----------------------------------------|--------------------|--------------------------------|
| Japanese                     | 1734     | 40.0                                   | 15.3                                    | 25.4               | 50.2                           |
| Asian/Pacific Islander       | 19       | 42.1                                   | 15.7                                    | 57.8               | 42.1                           |
| Caucasian                    | 1794     | 56.5                                   | 22.6                                    | 31.9               | 39.0                           |
| African American             | 34       | 50.0                                   | 29.4                                    | 29.4               | 26.1                           |
| Hispanic                     | 27       | 55.5                                   | 29.6                                    | 38.4               | 16.0                           |
| Mismatched                   | 171      | 60.0                                   | 23.5                                    | 33.2               | 32.3                           |
| Unknown                      | 555      | 61.7                                   | 20.1                                    | 30.0               | 48.3                           |

**Table S2. Leukemia relapse rate by the severity of acute GVHD.**

| <b>Acute GVHD</b> | <b>Japanese Pairs</b> |                              | <b>Caucasian Pairs</b> |                              |
|-------------------|-----------------------|------------------------------|------------------------|------------------------------|
|                   | <b>N</b>              | <b>5-yr Relapse Rate (%)</b> | <b>N</b>               | <b>5-yr Relapse Rate (%)</b> |
| Grades 0 - II     | 290                   | 26.6                         | 376                    | 34.4                         |
| Grades III - IV   | 38                    | 29.8                         | 74                     | 26.6                         |
|                   |                       | P=0.85                       |                        | P=0.62                       |
| Grades 0 - I      | 218                   | 28.3                         | 205                    | 35.9                         |
| Grades II - IV    | 110                   | 23.9                         | 245                    | 30.5                         |
|                   |                       | P=0.29                       |                        | P=0.16                       |

**Table S3. Other risk factors for acute GVHD, relapse and survival.**

|                                         | N    | Grades II-IV<br>Acute GVHD<br>HR (95% CI) | P<br>Value | Grades III-IV<br>Acute GVHD<br>HR (95% CI) | P<br>Value | Relapse<br>HR (95% CI) | P<br>Value | Survival<br>HR (95% CI) | P Value |
|-----------------------------------------|------|-------------------------------------------|------------|--------------------------------------------|------------|------------------------|------------|-------------------------|---------|
| <b>Patient age<br/>(linear)</b>         |      | 1.00 (0.96-1.00)                          | 0.86       | 1.00 (1.00-1.01)                           | 0.68       | 1.00 (0.99-1.00)       | 0.90       | 1.01 (1.01-1.02)        | <0.001  |
| <b>Donor age (linear)</b>               |      | 1.01 (1.00-1.01)                          | 0.006      | 1.014 (1.01-1.02)                          | 0.001      | 1.00 (0.99-1.00)       | 0.17       | 1.01 (1.00-1.01)        | 0.004   |
| <b>Disease</b>                          |      |                                           |            |                                            |            |                        |            |                         |         |
| Acute lymphoblastic leukemia            | 1232 | 1.00                                      |            | 1.00                                       |            | 1.00                   |            | 1.00                    |         |
| Acute myeloid leukemia                  | 1758 | 0.90 (0.81-1.01)                          | 0.10       | 0.88 (0.73-1.07)                           | 0.22       | 0.89 (0.77-1.03)       | 0.13       | 0.85 (0.76-0.95)        | 0.004   |
| Chronic myeloid leukemia                | 1345 | 1.24 (1.06-1.45)                          | 0.007      | 1.43 (1.12-1.82)                           | 0.004      | 0.73 (0.57-0.92)       | 0.009      | 0.87 (0.75-1.02)        | 0.09    |
| <b>Leukemia risk*</b>                   |      |                                           |            |                                            |            |                        |            |                         |         |
| Low                                     | 938  | 1.00                                      |            | 1.00                                       |            | 1.00                   |            | 1.00                    |         |
| Intermediate                            | 2441 | 1.09 (0.93-1.27)                          | 0.28       | 1.27 (1.00-1.61)                           | 0.05       | 2.49 (1.86-3.33)       | <0.001     | 1.81 (1.54-2.14)        | <0.001  |
| High                                    | 931  | 1.17 (0.98-1.41)                          | 0.08       | 1.53 (1.16-2.02)                           | 0.002      | 8.18 (6.06-11.06)      | <0.001     | 4.32 (3.62-5.15)        | <0.001  |
| Unknown                                 | 25   | 1.25 (0.66-2.38)                          | 0.48       | 1.06 (0.33-3.39)                           | 0.91       | 3.65 (1.65-8.08)       | 0.001      | 1.61 (0.82-3.17)        | 0.16    |
| <b>GVHD prophylaxis</b>                 |      |                                           |            |                                            |            |                        |            |                         |         |
| Cyclosporine based                      | 2593 | 1.00                                      |            | 1.00                                       |            | 1.00                   |            | 1.00                    |         |
| Tacrolimus based                        | 1536 | 0.83 (0.75-0.92)                          | 0.002      | 0.93 (0.79-1.09)                           | 0.39       | 0.97 (0.84-1.10)       | 0.66       | 0.87 (0.80-0.96)        | 0.007   |
| Other                                   | 78   | 1.00 (0.74-1.34)                          | 1.0        | 0.98 (0.58-1.67)                           | 0.97       | 1.24 (0.83-1.85)       | 0.28       | 1.12 (0.82-1.52)        | 0.45    |
| Unknown                                 | 128  | 0.61 (0.43-0.88)                          | 0.009      | 0.49 (0.26-0.94)                           | 0.03       | 1.12 (0.70-1.81)       | 0.62       | 1.13 (0.81-1.57)        | 0.45    |
| <b>Conditioning regimen</b>             |      |                                           |            |                                            |            |                        |            |                         |         |
| Myeloablative                           | 3687 | 1.00                                      |            | 1.00                                       |            | 1.00                   |            | 1.00                    |         |
| Non-myeloablative/<br>reduced intensity | 381  | 0.92 (0.77-1.08)                          | 0.34       | 1.20 (0.93-1.56)                           | 0.15       | 1.36 (1.09-1.69)       | 0.005      | 1.02 (0.88-1.19)        | 0.71    |

|                               |      |                  |        |                  |      |                  |      |                  |      |
|-------------------------------|------|------------------|--------|------------------|------|------------------|------|------------------|------|
| Unknown                       | 267  | 0.53 (0.41-0.68) | <0.001 | 1.14 (0.78-1.68) | 0.47 | 0.77 (0.53-1.11) | 0.17 | 0.83 (0.65-1.07) | 0.16 |
| <b>Total body irradiation</b> |      |                  |        |                  |      |                  |      |                  |      |
| no                            | 949  | 1.00             |        | 1.00             |      | 1.00             |      | 1.00             |      |
| yes                           | 3371 | 1.22 (1.09-1.36) | <0.001 | 1.20 (1.00-1.44) | 0.05 | 1.03 (0.88-1.20) | 0.69 | 1.02 (0.91-1.13) | 0.71 |
| Unknown                       | 15   | 1.11 (0.45-2.72) | 0.81   | 0.78 (0.19-3.21) | 0.74 | 1.68 (0.77-3.63) | 0.19 | 1.27 (0.67-2.41) | 0.45 |

\*Low risk: chronic phase (CP) of chronic myeloid leukemia, Intermediate risk: the first or second remission of acute lymphoblastic leukemia and acute myeloid leukemia, or the second CP or accelerated phase of chronic myeloid leukemia, High risk: more advanced stage than intermediate risk.

**Table S4. Hazard risk (HR) of acute GVHD, leukemia relapse and mortality by ethnicity in bone marrow transplantation cases**

|                                          | N    | Grades II-IV Acute<br>GVHD<br>HR (95%<br>CI) | P Value | Grades III-IV Acute<br>GVHD<br>HR (95%<br>CI) | P Value | Relapse<br>HR (95% CI) | P Value | Mortality<br>HR (95% CI) | P Value |
|------------------------------------------|------|----------------------------------------------|---------|-----------------------------------------------|---------|------------------------|---------|--------------------------|---------|
| <b>Ethnicity</b>                         |      |                                              |         |                                               |         |                        |         |                          |         |
| Japanese pair                            | 1734 | 1.00                                         |         | 1.00                                          |         | 1.00                   |         | 1.00                     |         |
| Asian pair                               | 9    | 1.06 (0.39-2.84)                             | 0.903   | 1.50 (0.37-6.05)                              | 0.569   | 2.68 (1.10-6.54)       | 0.03    | 1.57 (0.70-3.53)         | 0.27    |
| Caucasian pair                           | 1272 | 1.46 (1.30-1.64)                             | <0.001  | 1.45 (1.21-1.74)                              | <0.001  | 1.63 (1.38-1.92)       | <0.001  | 1.45 (1.30-1.62)         | <0.001  |
| African pair                             | 24   | 1.34 (0.76-2.34)                             | 0.302   | 1.83 (0.85-3.96)                              | 0.121   | 2.71 (1.26-5.84)       | 0.011   | 2.66 (1.65-4.29)         | <0.001  |
| Hispanic pair                            | 19   | 1.63 (0.89-2.97)                             | 0.108   | 1.57 (0.58-4.25)                              | 0.369   | 2.90 (1.36-6.18)       | 0.006   | 2.26 (1.32-3.85)         | 0.003   |
| Mismatched ethnicity                     | 73   | 1.50 (1.09-2.06)                             | 0.011   | 1.37 (0.82-2.29)                              | 0.216   | 1.75 (1.11-2.75)       | 0.016   | 1.67 (1.25-2.24)         | <0.001  |
| Unknown ethnicity                        | 349  | 1.69 (1.40-2.04)                             | <0.001  | 1.52 (1.12-2.06)                              | 0.007   | 1.55 (1.16-2.00)       | 0.003   | 1.30 (1.07-1.58)         | 0.006   |
| <b>HLA-DPB1 matching (GVH direction)</b> |      |                                              |         |                                               |         |                        |         |                          |         |
| Match                                    | 994  | 1.00                                         |         | 1.00                                          |         | 1.00                   |         | 1.00                     |         |
| 1-allele mismatch                        | 1414 | 1.36 (1.20-1.54)                             | <0.001  | 1.46 (1.19-1.79)                              | 0.001   | 0.67 (0.57-0.74)       | <0.001  | 1.02 (0.91-1.15)         | 0.620   |
| 2-allele mismatch                        | 744  | 1.51 (1.31-1.74)                             | <0.001  | 1.52 (1.21-1.91)                              | <0.001  | 0.54 (0.44-0.66)       | <0.001  | 1.04 (0.91-1.19)         | 0.494   |
| Unknown                                  | 328  | 1.05 (0.85-1.30)                             | 0.634   | 0.99 (0.69-1.41)                              | 0.299   | 0.61 (0.47-0.81)       | 0.001   | 0.69 (0.56-0.85)         | 0.001   |

Multivariate analysis adjusted for clinical factors listed in Table 1. Data from one North American pair is not shown in this table.

**Table S5. Leukemia relapse rate by ethnicity, leukemia cell type and the status at transplantation in bone marrow transplantation cases**

|                                    | N   | Acute lymphoblastic leukemia | N   | Acute myeloid leukemia | N   | Chronic myeloid leukemia |
|------------------------------------|-----|------------------------------|-----|------------------------|-----|--------------------------|
| <b>Early status</b>                |     |                              |     |                        |     |                          |
| Japanese pair                      | 469 | 23.9 <sup>†</sup>            | 465 | 20.9                   | 269 | 7.3                      |
|                                    |     | p= 0.002                     |     | p<0.001                |     | p=0.012                  |
| Caucasian pair                     | 197 | 32.4                         | 215 | 27.9                   | 449 | 11.4                     |
| <b>Advanced status<sup>‡</sup></b> |     |                              |     |                        |     |                          |
| Japanese pair                      | 124 | 54.5                         | 205 | 43.7                   | 123 | 24.3                     |
|                                    |     | p=0.45                       |     | p=0.11                 |     | p=0.52                   |
| Caucasian pair                     | 90  | 48.8                         | 149 | 46.3                   | 161 | 23.8                     |

\*First and second complete remission (CR) of acute lymphoblastic leukemia or acute myeloid leukemia at transplantation, first chronic phase of chronic myeloid leukemia at transplantation. <sup>†</sup> Cumulative incidence (%) of leukemia relapse at 5 years after transplantation. <sup>‡</sup> More advanced status than early status.

**Table S6. Data contributors from International Histocompatibility Working Group in Hematopoietic Cell Transplantation.**

The following members of the IHWG HCT contributed data to this publication:

**Austria**

Gottfried Fischer and Wolfgang Mayr. Department for Blood Group Serology and Transfusion Medicine, Medical University of Vienna, Vienna

**Canada**

Marlis L. Schroeder. Department of Pediatrics and Child Health, University of Manitoba, Winnipeg

Cindy Ellison. Department of Pathology, University of Manitoba, Winnipeg

Luvia Kwan. HLA Laboratory, Cancer Care Manitoba, Winnipeg

**Czech Republic**

Pavel Jindra and Petra Venigova, Czech National Marrow Donor Registry, HLA Laboratory, Pilsen

**France**

Lena Absi. Laboratoire d'Histocompatibilité, EFS Auvergne Loire, Saint Etienne

Valerie Dubois. EFS Rhone Alpes- Laboratoire HLA, Lyon

Anne Cesbron and Katia Gagne. Laboratoire d'Histocompatibilité et d'Immunogénétique, EFS Pays de Loire, Nantes

Isabelle Jollet. HLA EFS Centre Atlantique, Poitiers

Dominique Masson. Laboratoire d'Histocompatibilité, EFS Rhone Alpes, Grenoble

Muriel DeMatteis and Ghislaine Bernard. Laboratoire Immunologie Hôpital Archet 1, Nice

Daniel Hanau and Anne Parissiadis. Laboratoire d'Histocompatibilité, Etablissement de Transfusion Sanguine-Alsace, Strasbourg

**Germany**

Martin Bornhauser and Gerhard Ehninger. Universitätsklinikum Carl Gustav Carus, Dresden

Monika Füssel. DKMS Life Science Laboratory, Dresden

**Italy**

Angelica Canossi and Anna Aureli. Institute CNR of Translational Pharmacology, L'Aquila

Paolo Di Bartolomeo. Centro trapianti di midollo osseo, Ospedale S.Spirito, Pescara

**Japan**

Yasuo Morishima. Aichi Cancer Center, Nagoya and the JMDP, Tokyo

Takakazu Kawase. Aichi Cancer Center Research Institute, Nagoya and the JMDP, Tokyo

**The Netherlands**

Machteld Oudshoorn, Leiden University Medical Centre and Eurodonor Foundation, Leiden

**Norway**

Torstein Egeland and John Torgils Vaage. Department of Immunology, Oslo University Hospital - Rikshospitalet, Oslo

Lorentz Brinch. Department of Haematology, Oslo University Hospital-Rikshospitalet, Oslo

**South Africa**

Ernette DuToit. University of Cape Town, Cape Town and South African Bone Marrow Registry

Peter Jacobs and Lucille Wood. The Department of Haematology and Bone Marrow Transplant Unit incorporating the Searll Research Laboratory for Cellular and Molecular Biology Constantiaberg Medi-Clinic, Cape Town

**Sweden**

Mats Bengtsson. Department of Clinical Immunology, Rudbeck Laboratory, Uppsala University Hospital, Uppsala

Marie Schaffer. Division of Clinical Immunology F79, Karolinska institutet, Karolinska University Hospital, Huddinge, Stockholm

Olle Ringdén. Karolinska University Hospital, Huddinge, Stockholm

**Switzerland**

Jean-Marie Tiercy. National Reference Laboratory for Histocompatibility (LNRH), University Hospital, Geneva

Yves Chalandon. Division of Hematology, University Hospital Geneva, Geneva

Jakob Passweg. Martin Stern, Alois Gratwohl. Division of Hematology, Department of Internal Medicine, Kantonsspital, Basel



Urs Schanz. Division of Hematology, University Hospital of Zürich, Zürich  
Tayfun Güngör. University Children's Hospital, Zürich

**United Kingdom**

Arlene Frater, Brendan Clarke, Gordon Cook. Transplant Immunology, St. James University Hospital, Leeds

**United States**

Effie Petersdorf, Mari Malkki, Gary Schoch and Ted Gooley. Fred Hutchinson Cancer Research Center, Seattle

Katharine Hsu. Memorial Hospital, Memorial Sloan-Kettering Cancer Center, New York

David Senitzer and Ketevan Gendzekhadze. City of Hope National Cancer Center, City of Hope, Duarte

**Clinical Data Registries**

**Center for International Blood and Marrow Transplant Research (CIBMTR)**

Mary Horowitz, John Klein and Tao Wang. Medical College of Wisconsin, Milwaukee

Stephen Spellman and Mike Haagenson. CIBMTR, Minneapolis

Stephanie Lee. Fred Hutchinson Cancer Research Center, Seattle

**European Group for Blood and Marrow Transplantation (EBMT)**

Andrea Velardi. University of Perugia, Perugia

Carmen Ruiz de Elvira. Guy's Hospital, London

**Société Française de Greffe de Moelle et Thérapie Cellulaire (SFGM-TC)**

Nicole Raus. Centre Hospitalier Lyon Sud, Service d'hématologie, Lyon

Mohamad Mohty. Service d'Hématologie Clinique CHU Hotel Dieu, Nantes

Evelyne Marry and Marie-Lorraine Balère. RFGM, Agence de la Biomédecine, La Plaine Saint Denis, Paris

**The Dutch National Transplant Registry (Typhon)**

Jan J Cornelissen. Erasmus Medical Centre- Daniel den Hoed, Department of Haematology, Rotterdam

Anja van Biezen. Department of Medical Statistics, Leiden University Medical Centre, Leiden

**Japan Marrow Donor Program (JMDP)**

Yasuo Morishima. Aichi Cancer Center, Nagoya

Keisei Kawa. Japanese Red Cross Kinki Block Blood Center, Osaka
